# Supplementary material for: Resistance to checkpoint blockade therapy through inactivation of antigen presentation
Source: PubMed Central journal article supplement (PMC5656607; doi:10.1038/s41467-017-01062-w), 2017-10-26
Supplement: 41467_2017_1062_MOESM3_ESM.pdf [file 41467_2017_1062_MOESM3_ESM.pdf]

## **Description of Additional Supplementary Files**

File Name: Supplementary Data 1

Description: Patients clinical parameters.

File Name: Supplementary Data 2

Description: List of all non-silent mutations found in all six biopsies taken from Pat208, who was treated with CPB and developed resistance after an initial response.

File Name: Supplementary Data 3

Description: Gene sets used to evaluate the presence of different immune cell types, immune cell state and tumor microenvironment factors from the RNAseq data.

File Name: Supplementary Data 4

Description: Summary of the mutations and LOH in genes related to the IFN $\gamma$  and antigen presentation machinery found in the three analyzed cohorts.

File Name: Supplementary Data 5

Description: IHC protocols summary.
